# Supplementary material for: Characterization of hyperkalemic periodic paralysis: a survey of genetically diagnosed individuals
Source: PubMed Central journal article supplement (PMC3824221; doi:10.1007/s00415-013-7025-9), 2013-07-25
Supplement: 415_2013_7025_MOESM2_ESM.pdf [file 415_2013_7025_MOESM2_ESM.pdf]

|                                                                         |    |  |
|-------------------------------------------------------------------------|----|--|
| <b>Gender</b>                                                           |    |  |
| Respondents                                                             | 92 |  |
| Male                                                                    | 49 |  |
| Female                                                                  | 43 |  |
|                                                                         |    |  |
| <b>Mutations (all other mutations were represented by ≤ 3 subjects)</b> |    |  |
| Respondents                                                             | 94 |  |
| T704M                                                                   | 27 |  |
| M1592V                                                                  | 19 |  |
| I692M*                                                                  | 10 |  |
| R1448H                                                                  | 7  |  |
| T1313M                                                                  | 5  |  |
|                                                                         |    |  |
| <b>Comorbid Conditions</b>                                              |    |  |
| Thyroid                                                                 | 19 |  |
| High blood pressure                                                     | 19 |  |
| Arrhythmias                                                             | 9  |  |
| Migraines                                                               | 9  |  |
| High triglycerides/cholesterol                                          | 8  |  |
| Kidney problems                                                         | 5  |  |
| Diabetes, type 2                                                        | 4  |  |
| Coronary artery disease                                                 | 3  |  |
| Attention deficit disorder/Attention deficit hyperactivity disorder     | 1  |  |
| Diabetes, type 1                                                        | 0  |  |
|                                                                         |    |  |
| <b>Age of First Attack</b>                                              |    |  |
| Respondents                                                             | 84 |  |
| Age 10-19                                                               | 21 |  |
|                                                                         |    |  |
| <b>Diagnostic studies underwent prior to diagnosis of hyperPP</b>       |    |  |
| Blood tests                                                             | 63 |  |
| EMG                                                                     | 46 |  |
| EKG                                                                     | 30 |  |
| Muscle biopsies                                                         | 26 |  |
| Urine tests                                                             | 25 |  |
| Nerve conduction study                                                  | 22 |  |

|                                                 |    |  |  |
|-------------------------------------------------|----|--|--|
| Potassium challenge                             | 22 |  |  |
| Creatine kinase                                 | 17 |  |  |
| Fasting challenge                               | 16 |  |  |
| Compound muscle action potential test           | 8  |  |  |
| Ice water test                                  | 2  |  |  |
|                                                 |    |  |  |
| <b>Concomitant Paramyotonia and/or Myotonia</b> |    |  |  |
| Respondents                                     | 86 |  |  |
| Paramyotonia                                    | 39 |  |  |
| Paramyotonia + myotonia                         | 24 |  |  |
| Myotonia                                        | 48 |  |  |
| Myotonia + paramyotonia                         | 24 |  |  |
| Myotonia + progressive muscle weakness          | 18 |  |  |
| No myotonia                                     | 12 |  |  |
| No myotonia + progressive muscle weakness       | 4  |  |  |
|                                                 |    |  |  |
| <b>Attack Triggers</b>                          |    |  |  |
| Total respondents                               | 91 |  |  |
| Female respondents                              | 43 |  |  |
| Cold environments                               | 69 |  |  |
| Rest after exercise                             | 61 |  |  |
| Stress or fatigue                               | 43 |  |  |
| Alcohol                                         | 41 |  |  |
| Hunger                                          | 39 |  |  |
| Changes in activity level                       | 37 |  |  |
| Potassium in food                               | 32 |  |  |
| Specific foods or beverages                     | 32 |  |  |
| Changes in humidity                             | 32 |  |  |
| Extra sleep                                     | 31 |  |  |
| Pregnancy                                       | 12 |  |  |
| Illness of any type                             | 24 |  |  |
| Menstruation                                    | 8  |  |  |
| Medication                                      | 15 |  |  |
| Potassium supplements                           | 13 |  |  |
|                                                 |    |  |  |
| <b>Typical time of day of attack occurrence</b> |    |  |  |

|                                       |    |  |  |
|---------------------------------------|----|--|--|
| Respondents                           | 86 |  |  |
| Morning                               | 48 |  |  |
| During sleep                          | 39 |  |  |
| Upon waking                           | 37 |  |  |
| Afternoon                             | 25 |  |  |
| Evening                               | 17 |  |  |
|                                       |    |  |  |
| <b>Prodromal symptoms</b>             |    |  |  |
| Respondents                           | 70 |  |  |
| Day prior: positive response          | 27 |  |  |
| Immediately prior: positive responses | 60 |  |  |
|                                       |    |  |  |
| <b>Attack frequency</b>               |    |  |  |
| Respondents                           | 87 |  |  |
| 1-3 per month                         | 26 |  |  |
| 1 per week                            | 18 |  |  |
| 2-6 per week                          | 21 |  |  |
|                                       |    |  |  |
| <b>Typical attack duration</b>        |    |  |  |
| Respondents                           | 80 |  |  |
| <5 min                                | 8  |  |  |
| 5-15 minutes                          | 3  |  |  |
| 15-30 minutes                         | 11 |  |  |
| 30 minute to an hour                  | 17 |  |  |
| 1-2 hours                             | 5  |  |  |
| 3-4 hours                             | 5  |  |  |
| 10-15 hours                           | 2  |  |  |
| 20 hours-1 day                        | 4  |  |  |
| 1-2 days                              | 8  |  |  |
| >2 days                               | 17 |  |  |
|                                       |    |  |  |
| <b>Longest attack</b>                 |    |  |  |
| Respondents                           | 83 |  |  |
| Over 1 week                           | 19 |  |  |
|                                       |    |  |  |
| <b>Body region affected by attack</b> |    |  |  |

|                                                                                      |    |                 |                                        |
|--------------------------------------------------------------------------------------|----|-----------------|----------------------------------------|
| Respondents                                                                          | 92 |                 |                                        |
| Calves                                                                               | 86 |                 |                                        |
| Arms                                                                                 | 84 |                 |                                        |
| Hands                                                                                | 83 |                 |                                        |
| Thighs                                                                               | 83 |                 |                                        |
| Feet                                                                                 | 70 |                 |                                        |
| Eyelids                                                                              | 58 |                 |                                        |
| Face                                                                                 | 57 |                 |                                        |
| Neck                                                                                 | 54 |                 |                                        |
| Speaking musculature                                                                 | 53 |                 |                                        |
| Hips                                                                                 | 39 |                 |                                        |
| Breathing musculature                                                                | 24 |                 |                                        |
| Trunk                                                                                | 5  |                 |                                        |
|                                                                                      |    |                 |                                        |
| <b>Severity of most attacks</b>                                                      |    |                 |                                        |
| Respondents                                                                          | 90 |                 |                                        |
| Very mild – barely noticeable to others, few limitations                             | 5  |                 |                                        |
| Mild – have only some limitations on mobility, others would notice I am in an attack | 39 |                 |                                        |
| Moderate – have some movement, can self-medicate                                     | 32 |                 |                                        |
| Severe – can speak, cannot move at all, can call for help                            | 12 |                 |                                        |
| Very severe – cannot speak, cannot call for help                                     | 2  |                 |                                        |
|                                                                                      |    |                 |                                        |
| <b>Severity of interictal symptoms</b>                                               |    |                 |                                        |
| Respondents                                                                          | 89 |                 |                                        |
| Severe, impairs activities of daily living                                           | 11 |                 |                                        |
| Moderate                                                                             | 12 |                 |                                        |
| Mild                                                                                 | 30 |                 |                                        |
| No symptoms                                                                          | 36 |                 |                                        |
|                                                                                      |    |                 |                                        |
| <b>Muscle pain</b>                                                                   |    |                 |                                        |
| Respondents                                                                          | 92 |                 |                                        |
| Muscle pain during attacks                                                           | 38 |                 |                                        |
| After attacks                                                                        | 57 |                 |                                        |
| None                                                                                 | 24 |                 |                                        |
|                                                                                      |    |                 |                                        |
| <b>Frequency of attacks over time</b>                                                |    | <b>Worsened</b> | <b>Stayed the same</b> <b>Improved</b> |

|                                                                        |                 |                        |                 |
|------------------------------------------------------------------------|-----------------|------------------------|-----------------|
| Childhood                                                              | 64              | 6                      | 0               |
| Puberty/teenage years                                                  | 31              | 5                      | 3               |
| 20-39                                                                  | 12              | 7                      | 4               |
| 40-69                                                                  | 9               | 3                      | 3               |
| 70+                                                                    | 1               | 0                      | 0               |
| Menopause                                                              | 1               | 0                      | 2               |
|                                                                        |                 |                        |                 |
| <b>Muscle stiffness during attacks</b>                                 | <b>Worsened</b> | <b>Stayed the same</b> | <b>Improved</b> |
| Childhood                                                              | 40              | 7                      | 0               |
| Puberty/teenage years                                                  | 14              | 6                      | 3               |
| 20-41                                                                  | 5               | 5                      | 5               |
| 40-71                                                                  | 6               | 3                      | 2               |
| 70+                                                                    | 0               | 0                      | 0               |
| Menopause                                                              | 2               | 0                      | 1               |
|                                                                        |                 |                        |                 |
| <b>Muscle weakness during attacks</b>                                  | <b>Worsened</b> | <b>Stayed the same</b> | <b>Improved</b> |
| Childhood                                                              | 5               | 10                     | 0               |
| Puberty/teenage years                                                  | 4               | 7                      | 6               |
| 20-40                                                                  | 4               | 6                      | 18              |
| 40-70                                                                  | 8               | 1                      | 11              |
| 70+                                                                    | 1               | 0                      | 0               |
| Menopause                                                              | 0               | 0                      | 1               |
|                                                                        |                 |                        |                 |
| <b>Permanent muscle weakness</b>                                       | <b>Worsened</b> | <b>Stayed the same</b> | <b>Improved</b> |
| Childhood                                                              | 18              | 8                      | 0               |
| Puberty/teenage years                                                  | 4               | 8                      | 0               |
| 20-42                                                                  | 3               | 7                      | 0               |
| 40-72                                                                  | 10              | 1                      | 0               |
| 70+                                                                    | 1               | 1                      | 0               |
| Menopause                                                              | 0               | 2                      | 0               |
|                                                                        |                 |                        |                 |
| <b>Progressive myopathy (muscle dysfunction) or permanent weakness</b> |                 |                        |                 |
| Respondents                                                            | 92              |                        |                 |
| Yes                                                                    | 28              |                        |                 |
| No                                                                     | 48              |                        |                 |
| Unsure                                                                 | 16              |                        |                 |

|                                      |                          |                          |  |
|--------------------------------------|--------------------------|--------------------------|--|
|                                      |                          |                          |  |
| <b>Level of Disease Control</b>      |                          |                          |  |
| Respondents                          | 83                       |                          |  |
| Mostly controlled                    | 37                       |                          |  |
| Needs improvement                    | 42                       |                          |  |
| Optimal                              | 4                        |                          |  |
|                                      |                          |                          |  |
| <b>Acute Medications</b>             | <b>Mostly Controlled</b> | <b>Needs Improvement</b> |  |
| Respondents                          | 14                       | 20                       |  |
| None                                 | 2                        | 4                        |  |
| Hydrochlorothiazide                  | 2                        | 5                        |  |
| Salbutamol                           | 2                        | 4                        |  |
| Mexiletine                           | 2                        | 1                        |  |
| Flecainide                           | 2                        | 0                        |  |
| Furosemide                           | 1                        | 0                        |  |
| Acetazolamide                        | 1                        | 4                        |  |
| Magnesium                            | 1                        | 3                        |  |
| Torsemide                            | 1                        | 0                        |  |
| Fenoterol                            | 1                        | 0                        |  |
| Orphenadrine                         | 1                        | 0                        |  |
| Nonsteroidal anti-inflammatory drugs | 1                        | 1                        |  |
| Calcium                              | 1                        | 1                        |  |
| Carbamazepine                        | 0                        | 1                        |  |
| Potassium                            | 0                        | 1                        |  |
| Propafenone                          | 0                        | 1                        |  |
| Muscle relaxants                     | 0                        | 1                        |  |
|                                      |                          |                          |  |
| <b>Chronic Medications</b>           | <b>Mostly Controlled</b> | <b>Needs improvement</b> |  |
| Respondents                          | 23                       | 26                       |  |
| Hydrochlorothiazide                  | 5                        | 4                        |  |
| Mexiletine                           | 5                        | 1                        |  |
| No treatment regimen                 | 4                        | 16                       |  |
| Flecainide                           | 3                        | 0                        |  |
| Acetazolamide                        | 2                        | 5                        |  |
| Salbutamol                           | 2                        | 1                        |  |
| Fludrocortisone                      | 1                        | 1                        |  |

|                                                                |                 |                        |                 |
|----------------------------------------------------------------|-----------------|------------------------|-----------------|
| Magnesium                                                      | 1               | 1                      |                 |
| Torsemide                                                      | 1               | 0                      |                 |
| Furosemide                                                     | 1               | 1                      |                 |
| Omeprazole                                                     | 1               | 0                      |                 |
| Vitamin C                                                      | 1               | 0                      |                 |
| Limptar                                                        | 1               | 0                      |                 |
| Salt                                                           | 1               | 0                      |                 |
| Potassium                                                      | 0               | 1                      |                 |
| Electrolyte fluid                                              | 0               | 1                      |                 |
|                                                                |                 |                        |                 |
| <b>Able to abort an attack</b>                                 |                 |                        |                 |
| Respondents                                                    | 86              |                        |                 |
| Never                                                          | 18              |                        |                 |
| Occasionally                                                   | 13              |                        |                 |
|                                                                |                 |                        |                 |
| <b>Episodes of weakness that improve with potassium intake</b> |                 |                        |                 |
| Respondents                                                    | 63              |                        |                 |
| Positive                                                       | 8               |                        |                 |
|                                                                |                 |                        |                 |
| <b>Years to arrive at current regimen</b>                      |                 |                        |                 |
| Respondents                                                    | 22              |                        |                 |
| 10+ years                                                      | 12              |                        |                 |
| 5-10 years                                                     | 5               |                        |                 |
| 1-5 years                                                      | 6               |                        |                 |
| <1 year                                                        | 2               |                        |                 |
|                                                                |                 |                        |                 |
| <b>Pregnancy</b>                                               | <b>Worsened</b> | <b>Stayed the same</b> | <b>Improved</b> |
| Frequency of attacks over time                                 | 11              | 0                      | 1               |
| Muscle stiffness during attacks                                | 6               | 0                      | 2               |
| Muscle weakness during attacks                                 | 1               | 0                      | 4               |
| Permanent muscle weakness                                      | 1               | 2                      | 0               |
|                                                                |                 |                        |                 |
| <b>Effects of surgery</b>                                      |                 |                        |                 |
| Respondents                                                    | 74              |                        |                 |
| Never had surgery                                              | 17              |                        |                 |
| Non-anesthetic surgical complications                          | 13              |                        |                 |

|                                             |    |  |  |
|---------------------------------------------|----|--|--|
|                                             |    |  |  |
| <b>Effects of local anesthesia</b>          |    |  |  |
| Respondents                                 | 83 |  |  |
| Never had local anesthesia                  | 7  |  |  |
| Complications related to local anesthesia   | 8  |  |  |
|                                             |    |  |  |
| <b>Effects of general anesthesia</b>        |    |  |  |
| Respondents                                 | 86 |  |  |
| Never had general anesthesia                | 19 |  |  |
| Complications related to general anesthesia | 20 |  |  |
